# Supplementary material
Source: publisher figshare collection journal article supplement (https://acs.figshare.com/ndownloader/files/4009348)

# ***Supporting information for the manuscript***

## **A Unique Silk Mat-Like Structured Pd/CeO<sub>2</sub> as an Efficient, Visible Light Photocatalyst for Green Organic Transformation in Water**

Yanhui Zhang,<sup>†,‡</sup> Nan Zhang,<sup>†,‡</sup> Zi-Rong Tang,<sup>‡</sup> and Yi-Jun Xu<sup>†,‡,\*</sup>

<sup>†</sup> *State Key Laboratory Breeding Base of Photocatalysis, College of Chemistry and Chemical Engineering, Fuzhou University, Fuzhou, 350002, P. R. China*

<sup>‡</sup> *College of Chemistry and Chemical Engineering, New Campus, Fuzhou University, Fuzhou, 350108, P. R. China*

*\*To whom correspondence should be addressed. Tel./fax: +86 591 83779326*

*E-mail Address: [yjxu@fzu.edu.cn](mailto:yjxu@fzu.edu.cn)*

### **Contents List:**

**Figure S1.** Typical TEM images of Pd/commercial CeO<sub>2</sub>.

**Figure S2.** Typical SEM image of Pd/commercial CeO<sub>2</sub>.

**Figure S3.** Controlled experiments using the bare CeO<sub>2</sub> nanoparticles (CeO<sub>2</sub>-NPs) and commercial CeO<sub>2</sub> for oxidation of alcohols under visible light irradiation for 4h. For comparison, the photoactivity yield over Pd/CeO<sub>2</sub>-NPs and Pd/commercial CeO<sub>2</sub> is also shown.

**Figure S4.** Photoluminescence (PL) spectra of the samples of Pd/CeO<sub>2</sub>-NPs, Pd/commercial CeO<sub>2</sub> and the bare support of commercial CeO<sub>2</sub> and CeO<sub>2</sub>-NPs (excited at a wavelength of 370 nm).

**Figure S5.** Controlled experiments using different radicals scavengers: *tert*-butyl alcohol (TBA) for hydroxyl radicals; ammonium oxalate (AO) for holes; benzoquinone (BQ) for superoxide radicals, and AgNO<sub>3</sub> for electrons, for oxidation of cinnamyl alcohol in water over Pd/CeO<sub>2</sub>-NPs under visible light irradiation for 4 h.

**Figure S6.** Controlled experiments using different radicals scavengers: *tert*-butyl alcohol (TBA) for hydroxyl radicals; ammonium oxalate (AO) for holes; benzoquinone (BQ) for superoxide radicals, and AgNO<sub>3</sub> for electrons, for oxidation of n-hexanol in water over Pd/CeO<sub>2</sub>-NPs under visible light irradiation for 4 h.

**Figure S7.** The electron spin resonance (ESR) spectra of superoxide radicals and hydroxyl radicals trapped by DMPO over the suspensions of Pd/CeO<sub>2</sub>-NPs and Pd/commercial CeO<sub>2</sub> under visible light irradiation.

**Figure S8.** Time-dependent •OH-trapping fluorescence spectra (excited at a wavelength of 312 nm) by the reaction of terephthalic acid (TA) with the •OH radicals photogenerated by the Pd/CeO<sub>2</sub>-NPs photocatalyst in an aqueous phase under visible light irradiation.

**Table S1.** Selective oxidation of various alcohols in organic solvent of benzonitrile (BTF) over Pd/CeO<sub>2</sub>-NPs and Pd/commercial CeO<sub>2</sub> under visible light irradiation (λ > 420 nm) for 4 h at room temperature.<sup>a</sup>

**Figure S9.** The nitrogen adsorption-desorption isotherms of the samples of Pd/CeO<sub>2</sub>-NPs and

Pd/commercial CeO<sub>2</sub>; below is the summary of surface area, total pore volume and pore size of Pd/CeO<sub>2</sub>-NPs and Pd/commercial CeO<sub>2</sub>.

**Figure S10.** Bar plot showing the adsorption capacity of Pd/CeO<sub>2</sub>-NPs and Pd/commercial CeO<sub>2</sub> toward substrate alcohols after the adsorption-desorption equilibrium is reached in the dark.

**Appendix for samples photographs.**

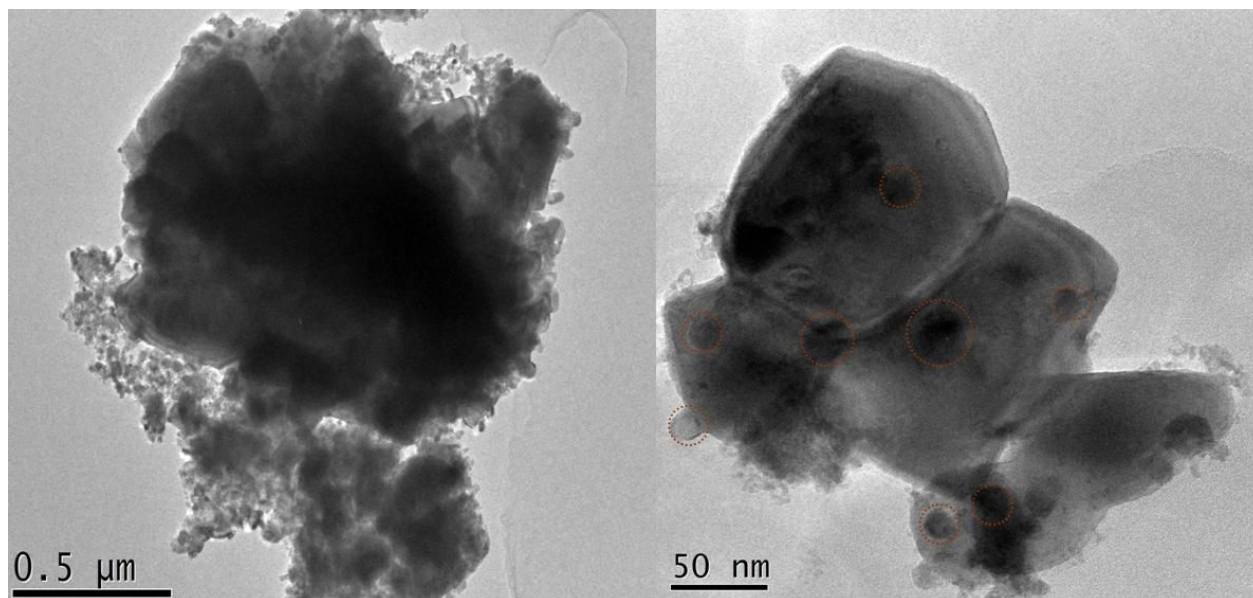

**Figure S1.** Typical TEM images of Pd/commercial CeO<sub>2</sub>.

**Note:** Red circled area is the Pd particles supported on commercial CeO<sub>2</sub>. It is clear to observe the obvious aggregation of Pd particles as compared to the original Pd colloidal nanoparticles.

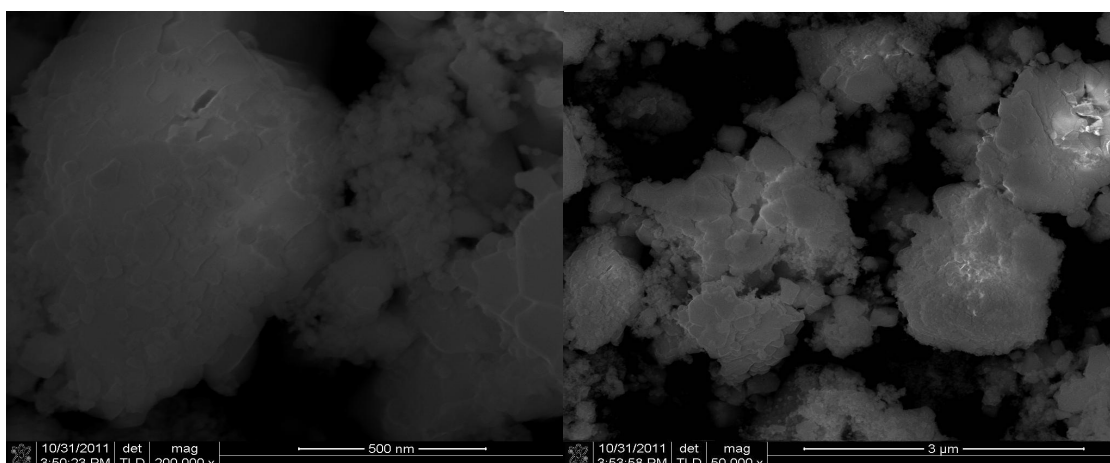

**Figure S2.** Typical SEM image of Pd/commercial CeO<sub>2</sub> at different magnification.

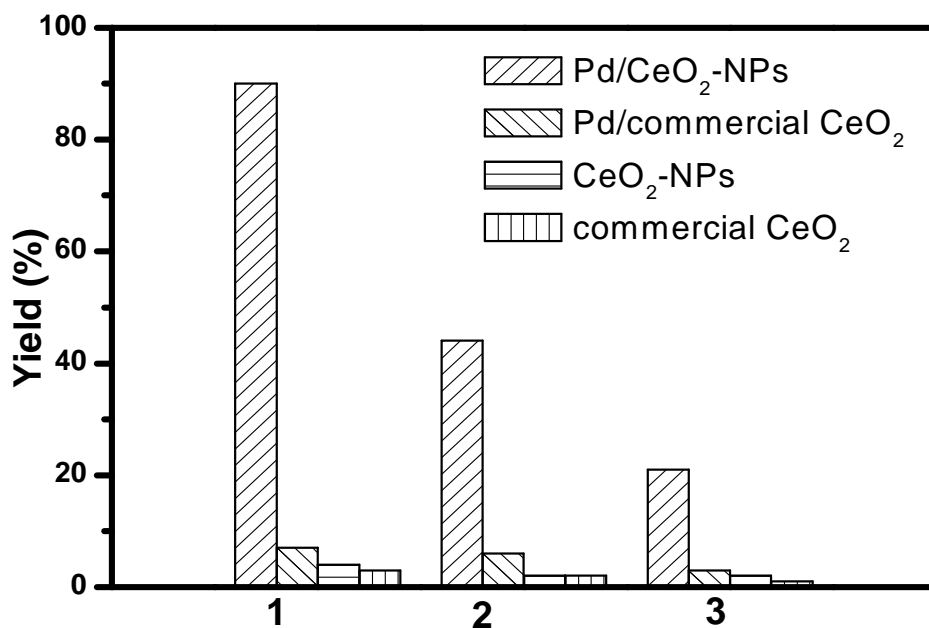

**Figure S3.** Controlled experiments using the bare CeO<sub>2</sub> nanoparticles (CeO<sub>2</sub>-NPs) and commercial CeO<sub>2</sub> for oxidation of alcohols under visible light irradiation for 4h. For comparison, the photoactivity yield over Pd/CeO<sub>2</sub>-NPs and Pd/commercial CeO<sub>2</sub> is also shown.

**Note:** number 1: benzyl alcohol; 2: cinnamyl alcohol; 3: n-hexanol.

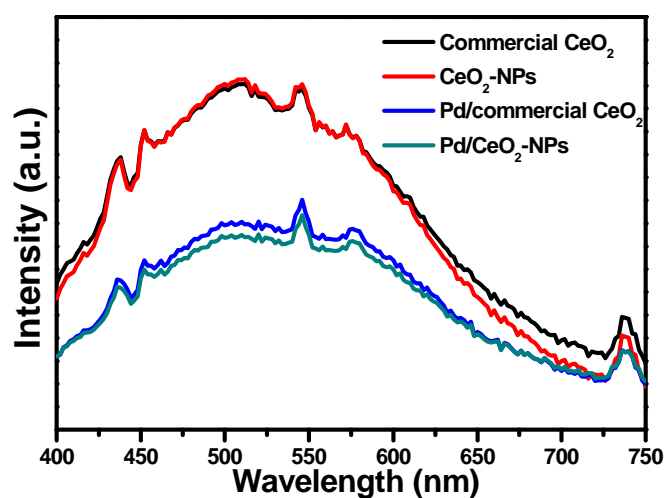

**Figure S4.** Photoluminescence (PL) spectra of the samples of Pd/CeO<sub>2</sub>-NPs, Pd/commercial CeO<sub>2</sub> and the bare support of commercial CeO<sub>2</sub> and CeO<sub>2</sub>-NPs (with an excitation wavelength of 370 nm).

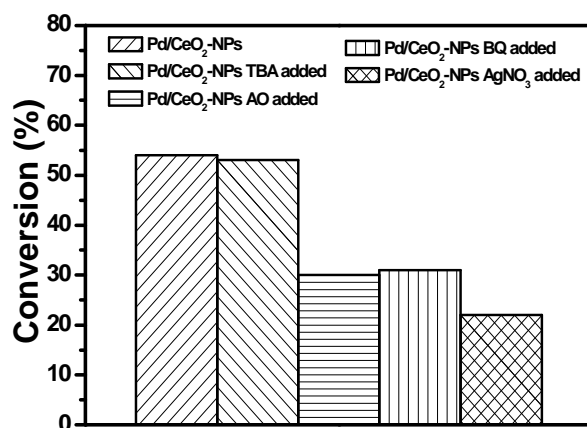

**Figure S5.** Controlled experiments using different radicals scavengers: *tert*-butyl alcohol (TBA) for hydroxyl radicals; ammonium oxalate (AO) for holes; benzoquinone (BQ) for superoxide radicals, and AgNO<sub>3</sub> for electrons, for oxidation of cinnamyl alcohol in water over Pd/CeO<sub>2</sub>-NPs under visible light irradiation for 4 h.

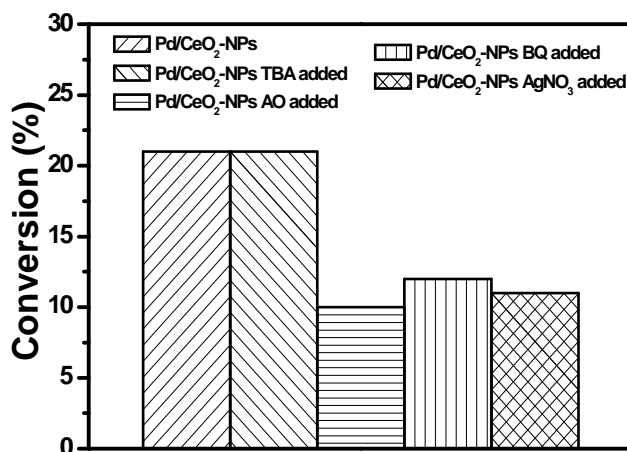

**Figure S6.** Controlled experiments using different radicals scavengers: *tert*-butyl alcohol (TBA) for hydroxyl radicals; ammonium oxalate (AO) for holes; benzoquinone (BQ) for superoxide radicals, and AgNO<sub>3</sub> for electrons, for oxidation of n-hexanol in water over Pd/CeO<sub>2</sub>-NPs under visible light irradiation for 4 h.

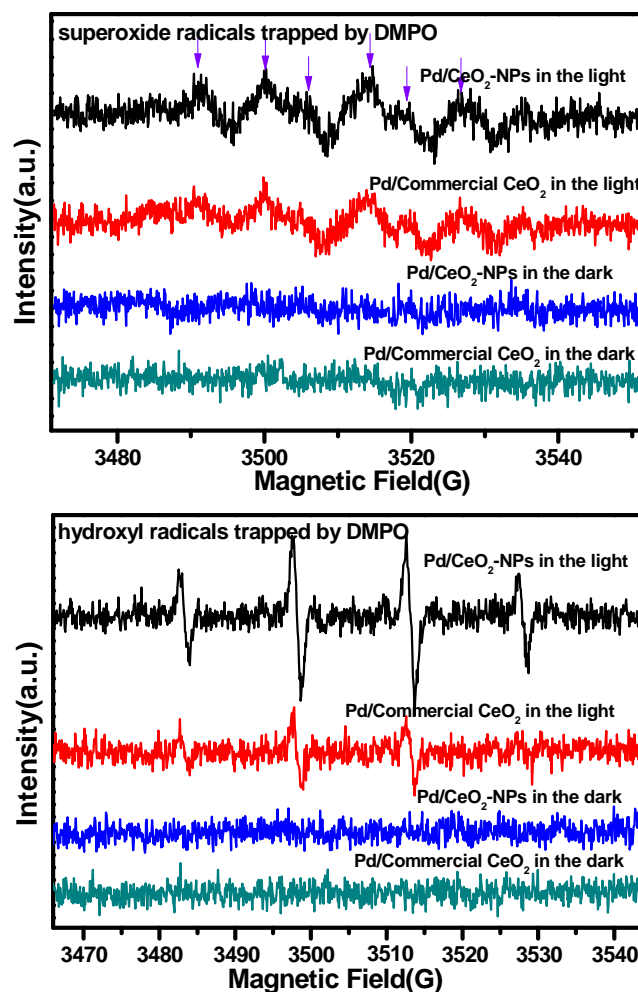

**Figure S7.** The electron spin resonance (ESR) spectra of superoxide radicals and hydroxyl radicals trapped by DMPO over the suspensions of Pd/CeO<sub>2</sub>-NPs and Pd/commercial CeO<sub>2</sub> under visible light irradiation.

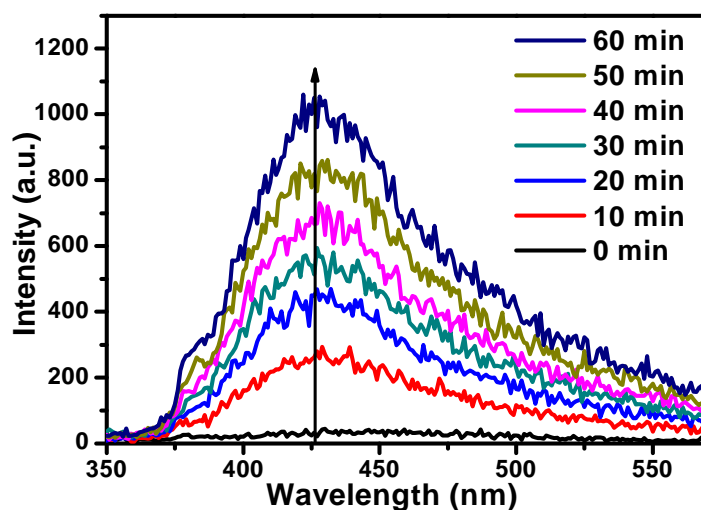

**Figure S8.** Time-dependent •OH-trapping fluorescence spectra (with an excitation wavelength of 312 nm) by the reaction of terephthalic acid (TA) with the •OH radicals photogenerated by the Pd/CeO<sub>2</sub>-NPs photocatalyst in an aqueous phase under visible light irradiation.

**Table S1.** Selective oxidation of various alcohols in organic solvent of benzotrifluoride (BTF) over Pd/CeO<sub>2</sub>-NPs and Pd/commercial CeO<sub>2</sub> under visible light irradiation ( $\lambda > 420$  nm) for 4 h at room temperature.<sup>a</sup>

| Entry | Substrate                                                                           | Product                                                                             | Conv.(%) | Sel.(%)   |
|-------|-------------------------------------------------------------------------------------|-------------------------------------------------------------------------------------|----------|-----------|
| 1     | 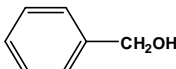   |    | 99 (4)   | 100 (100) |
| 2     |    |    | 51 (3)   | 100 (100) |
| 3     |    |    | 49 (3)   | 100 (100) |
| 4     |    |    | 58 (2)   | 100 (100) |
| 5     |    |    | 47 (3)   | 100 (100) |
| 6     |    |    | 51 (4)   | 92 (92)   |
| 7     |    |    | 41 (3)   | 84 (84)   |
| 8     |   |   | 19 (1)   | 100 (100) |
| 9     |  |  | 18 (1)   | 100 (100) |

<sup>a</sup> The data in parenthesis are conversion and selectivity over Pd/commercial CeO<sub>2</sub> under identical reaction conditions.

**Note:** The high selectivity to target products, aldehydes, as obtained in the solvent of water over Pd/CeO<sub>2</sub>-NPs and Pd/commercial CeO<sub>2</sub> under visible light irradiation is similar to that as obtained in the solvent of benzotrifluoride (BTF) in which no hydroxyl radicals are generated.<sup>S1,S2</sup> This strongly suggests that, for the highly active visible light Pd/CeO<sub>2</sub>-NPs photocatalyst, the presence of hydroxyl radicals in water does not affect the selectivity in a considerable way.

Ref. S1: Zhang, M.; Chen, C.; Ma, W.; Zhao, J. Visible-Light-Induced Aerobic Oxidation of Alcohols in a Coupled Photocatalytic System of Dye-Sensitized TiO<sub>2</sub> and TEMPO. *Angew. Chem. Int. Ed.* **2008**, *47*, 9730-9733.

Ref. S2: Zhang, Y.; Tang, Z. R.; Fu, X.; Xu, Y. J. Engineering the Unique 2D Mat of Graphene to Achieve Graphene-TiO<sub>2</sub> Nanocomposite for Photocatalytic Selective Transformation: What Advantage does Graphene Have over Its Forebear Carbon Nanotube? *ACS Nano* **2011**, *5*, 7426-7435.

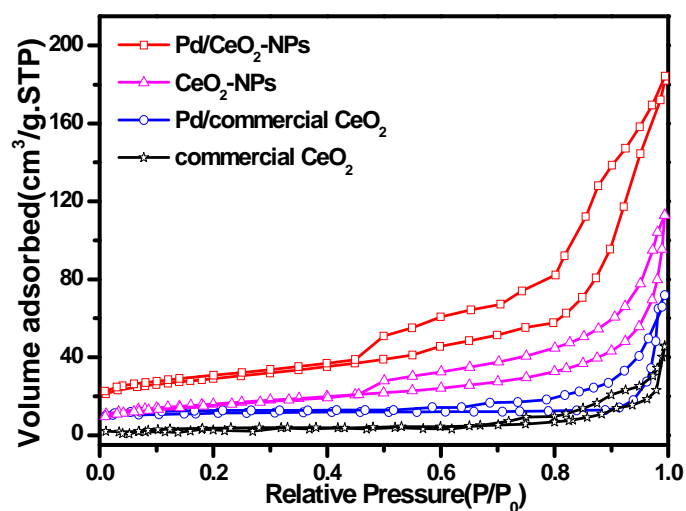

| Sample                           | Pd/CeO <sub>2</sub> -NPs | CeO <sub>2</sub> -NPs | Pd/ commercial CeO <sub>2</sub> | commercial CeO <sub>2</sub> |
|----------------------------------|--------------------------|-----------------------|---------------------------------|-----------------------------|
| Surface area (m <sup>2</sup> /g) | 145                      | 56                    | 24                              | 3                           |
| Pore volume (cm <sup>3</sup> /g) | 0.36                     | 0.17                  | 0.11                            | 0.03                        |

**Figure S9.** The nitrogen adsorption-desorption isotherms of the samples of Pd/CeO<sub>2</sub>-NPs and Pd/commercial CeO<sub>2</sub>; below is the summary of surface area and total pore volume of Pd/CeO<sub>2</sub>-NPs and Pd/commercial CeO<sub>2</sub>.

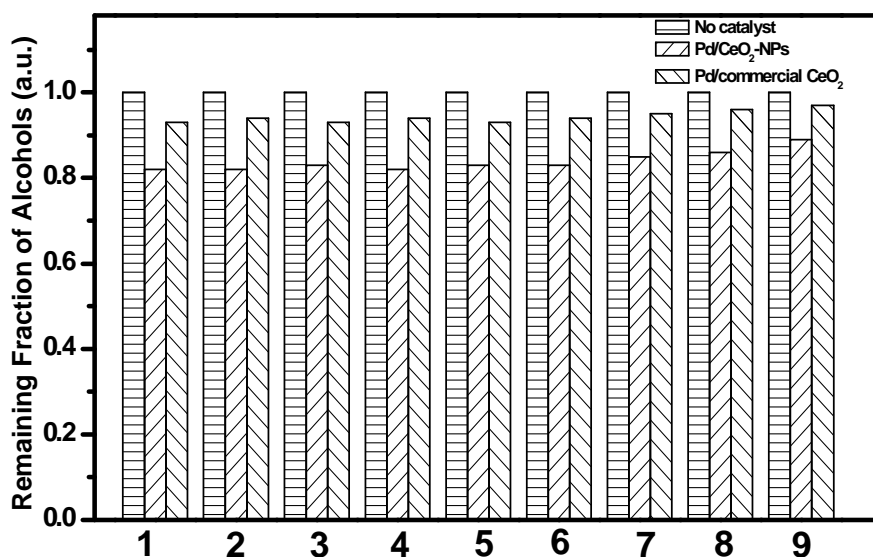

**Figure S10.** Bar plot showing the adsorption capacity of Pd/CeO<sub>2</sub>-NPs and Pd/commercial CeO<sub>2</sub> toward substrate alcohols after the adsorption-desorption equilibrium is reached in the dark.

**Note:** numbers 1-9 represent the same substrate alcohols as entry in **Table S1**.

**Note:** It is clear from **Figure S10** that the adsorption capacity of Pd/CeO<sub>2</sub>-NPs is higher than Pd/commercial CeO<sub>2</sub> toward substrate alcohols, which is in line with the higher surface area and pore volume of Pd/CeO<sub>2</sub>-NPs than Pd/commercial CeO<sub>2</sub>.



## Appendix for samples photographs.

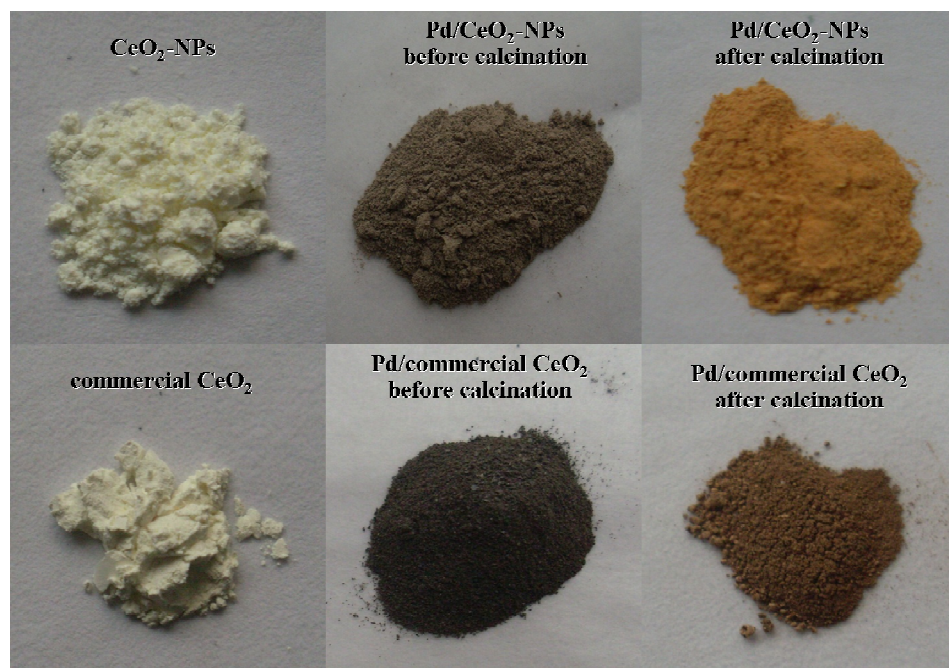

Supplement: Supplementary file 1 [file 4009348]
